# Supplementary material for: COVID-19–Related Life Experiences, Outdoor Play, and Long-term Adiposity Changes Among Preschool- and School-Aged Children in Singapore 1 Year After Lockdown
Source: PubMed Central journal article supplement (PMC8787686; doi:10.1001/jamapediatrics.2021.5585), 2022-01-24
Supplement: jamapediatr-e215585-s001.pdf [file jamapediatr-e215585-s001.pdf]

## Supplementary Online Content

Sum KK, Cai S, Law E, et al. COVID-19–related life experiences, outdoor play, and long-term adiposity changes in preschool- and school-aged children in Singapore 1 year after lockdown. *JAMA Pediatr*. Published online January 24, 2022. doi:10.1001/jamapediatrics.2021.5585

**eTable 1.** Characteristics of Respondents Versus Nonrespondents

**eTable 2.** Top Ten Most Commonly Reported Major Life Experiences in the Past Six Months

**eTable 3.** Risk Factors to Ceasing Outdoor Play or Exercise

**eTable 4.** Adiposity Measures Prelockdown and Postlockdown Among Children in the Study

**eFigure 1.** Parent-Reported Changes in Child’s Social Activities By Cohort

**eFigure 2.** Frequency of COVID-19–Related Education or Discussion

**eFigure 3.** Family Dynamics Postlockdown Compared to Prelockdown Period as Reported by School-Aged Child or Parent

**eFigure 4.** Parent- and Child-Reported Child Sleep Duration in the Postlockdown Period in School-Aged Children (GUSTO) Only

**eFigure 5.** Parent-Reported Child Desire or Aversion to Activities Outside the Home During Lockdown

**eFigure 6.** Average Ratings of the Parent-Reported Life Experiences in the Order of Most Negative to Most Positive

**eFigure 7.** Non-Neutral (Positive or Negative Ratings) of Major Recent Life Experiences, in Descending Order of Negative Ratings

**eFigure 8.** Association Between Prelockdown Household Income (per SGD 1000 Higher Income) and Odds of Having a Major Life Experience (yes/no), Adjusted for Cohort Membership

**eFigure 9.** Association Between Prelockdown Household Income (per SGD 2000 Higher Income) and Rating of Major Life Experience Among Those Who Experienced That Event, Adjusted for Cohort Membership

**eAppendix.** Modified Life Experiences Survey – COVID-19

This supplementary material has been provided by the authors to give readers additional information about their work.

**eTable 1.** Characteristics of Respondents Versus Nonrespondents

| Variable                                              | GUSTO (Primary-school-aged cohort) |                                    |                                |                      | Pre-school-aged cohort (S-PRESTO) |                                    |                                |                      |
|-------------------------------------------------------|------------------------------------|------------------------------------|--------------------------------|----------------------|-----------------------------------|------------------------------------|--------------------------------|----------------------|
|                                                       | N                                  | Non-respondent, N=388 <sup>1</sup> | Respondent, N=373 <sup>1</sup> | p-value <sup>2</sup> | N                                 | Non-respondent, N=139 <sup>1</sup> | Respondent, N=231 <sup>1</sup> | p-value <sup>2</sup> |
| <b>Ethnicity</b>                                      | 761                                |                                    |                                | 0.290                | 370                               |                                    |                                | 0.483                |
| Chinese                                               |                                    | 210 (54.12%)                       | 222 (59.52%)                   |                      |                                   | 102 (73.38%)                       | 180 (77.92%)                   |                      |
| Indian                                                |                                    | 67 (17.27%)                        | 58 (15.55%)                    |                      |                                   | 10 (7.19%)                         | 12 (5.19%)                     |                      |
| Malay                                                 |                                    | 111 (28.61%)                       | 92 (24.66%)                    |                      |                                   | 19 (13.67%)                        | 32 (13.85%)                    |                      |
| Others                                                |                                    | 0 (0.00%)                          | 1 (0.27%)                      |                      |                                   | 8 (5.76%)                          | 7 (3.03%)                      |                      |
| <b>Maternal age at delivery</b>                       | 761                                | 31.41 (5.15)                       | 30.76 (5.12)                   | 0.085                | 370                               | 30.88 (3.42)                       | 30.89 (3.10)                   | 0.985                |
| <b>Maternal education</b>                             | 756                                |                                    |                                | 0.061                | 370                               |                                    |                                | 0.209                |
| None/primary                                          |                                    | 27 (6.96%)                         | 13 (3.53%)                     |                      |                                   | 0 (0.00%)                          | 0 (0.00%)                      |                      |
| Secondary/ITE                                         |                                    | 144 (37.11%)                       | 126 (34.24%)                   |                      |                                   | 15 (10.79%)                        | 13 (5.63%)                     |                      |
| A-level/polytechnic/diploma                           |                                    | 95 (24.48%)                        | 88 (23.91%)                    |                      |                                   | 27 (19.42%)                        | 48 (20.78%)                    |                      |
| University/postgraduate                               |                                    | 122 (31.44%)                       | 141 (38.32%)                   |                      |                                   | 97 (69.78%)                        | 170 (73.59%)                   |                      |
| Missing                                               |                                    | 0                                  | 5                              |                      |                                   | 0                                  | 0                              |                      |
| <b>Household income</b>                               | 632                                | 5.00 (2.63)                        | 5.01 (2.64)                    | 0.975                | 295                               | 5.94 (2.33)                        | 6.13 (1.98)                    | 0.464                |
| Missing                                               |                                    | 58                                 | 71                             |                      |                                   | 27                                 | 48                             |                      |
| <b>Lives with partner</b>                             | 733                                | 359 (92.53%)                       | 325 (94.20%)                   | 0.379                | 334                               | 124 (98.41%)                       | 204 (98.08%)                   | >0.999               |
| Missing                                               |                                    | 0                                  | 28                             |                      |                                   | 13                                 | 23                             |                      |
| <b>Total household members (excluding respondent)</b> | 733                                | 3.36 (1.40)                        | 3.20 (1.48)                    | 0.125                | 331                               | 2.57 (1.43)                        | 2.55 (1.69)                    | 0.911                |
| Missing                                               |                                    | 0                                  | 28                             |                      |                                   | 14                                 | 25                             |                      |
| <b>Accommodation type</b>                             | 733                                |                                    |                                | 0.266                | 368                               |                                    |                                | 0.340                |
| 1 to 2-room HDB flat                                  |                                    | 10 (2.58%)                         | 19 (5.51%)                     |                      |                                   | 10 (7.25%)                         | 18 (7.83%)                     |                      |
| 3-room HDB flat                                       |                                    | 58 (14.95%)                        | 38 (11.01%)                    |                      |                                   | 23 (16.67%)                        | 40 (17.39%)                    |                      |
| 4 to 5-room HDB flat                                  |                                    | 257 (66.24%)                       | 235 (68.12%)                   |                      |                                   | 79 (57.25%)                        | 138 (60.00%)                   |                      |
| Condominium                                           |                                    | 37 (9.54%)                         | 27 (7.83%)                     |                      |                                   | 11 (7.97%)                         | 16 (6.96%)                     |                      |
| HUDC executive flat                                   |                                    | 10 (2.58%)                         | 13 (3.77%)                     |                      |                                   | 5 (3.62%)                          | 13 (5.65%)                     |                      |
| Landed property                                       |                                    | 13 (3.35%)                         | 10 (2.90%)                     |                      |                                   | 6 (4.35%)                          | 2 (0.87%)                      |                      |
| Others                                                |                                    | 3 (0.77%)                          | 3 (0.87%)                      |                      |                                   | 4 (2.90%)                          | 3 (1.30%)                      |                      |
| Missing                                               |                                    | 0                                  | 28                             |                      |                                   | 1                                  | 1                              |                      |
| <b>Own/rent housing</b>                               | 733                                |                                    |                                | 0.920                | 368                               |                                    |                                | 0.864                |
| Own                                                   |                                    | 343 (88.40%)                       | 303 (87.83%)                   |                      |                                   | 104 (75.36%)                       | 179 (77.83%)                   |                      |
| Rent                                                  |                                    | 24 (6.19%)                         | 21 (6.09%)                     |                      |                                   | 12 (8.70%)                         | 19 (8.26%)                     |                      |
| Occupied without paying rent                          |                                    | 21 (5.41%)                         | 21 (6.09%)                     |                      |                                   | 22 (15.94%)                        | 32 (13.91%)                    |                      |
| Missing                                               |                                    | 0                                  | 28                             |                      |                                   | 1                                  | 1                              |                      |
| <b>Child sex</b>                                      | 761                                |                                    |                                | 0.060                | 369                               |                                    |                                | 0.452                |

|                                                                                                                                                                                                                                             |         |                 |                 |       |  |                |                 |  |
|---------------------------------------------------------------------------------------------------------------------------------------------------------------------------------------------------------------------------------------------|---------|-----------------|-----------------|-------|--|----------------|-----------------|--|
| Male                                                                                                                                                                                                                                        |         | 210<br>(54.12%) | 176<br>(47.18%) |       |  | 79<br>(56.83%) | 121<br>(52.61%) |  |
| Female                                                                                                                                                                                                                                      |         | 178<br>(45.88%) | 197<br>(52.82%) |       |  | 60<br>(43.17%) | 109<br>(47.39%) |  |
| Missing                                                                                                                                                                                                                                     |         | 0               | 0               |       |  | 0              | 1               |  |
| <b>Child BMI (kg/m<sup>2</sup>)</b>                                                                                                                                                                                                         | 74<br>0 | 16.52<br>(3.22) | 16.55 (2.93)    | 0.881 |  |                |                 |  |
| Missing                                                                                                                                                                                                                                     |         | 2               | 19              |       |  |                |                 |  |
| <i><sup>1</sup>Non-respondents" are all active cohort members that participated in the last completed wave prior to lockdown, but did not complete the COVID-19 survey: delivery visit (S-PRESTO) or year 8 visit (GUSTO), respectively</i> |         |                 |                 |       |  |                |                 |  |
| <i><sup>2</sup>t-test for continuous variables; Fisher's exact test for categorical variables</i>                                                                                                                                           |         |                 |                 |       |  |                |                 |  |
|                                                                                                                                                                                                                                             |         |                 |                 |       |  |                |                 |  |
|                                                                                                                                                                                                                                             |         |                 |                 |       |  |                |                 |  |

**eTable 2.** Top Ten Most Commonly Reported Major Life Experiences in the Past Six Months

| <b>Event</b>                                                                                                                                                                                                     | <b>N</b> | <b>N = 604</b> |
|------------------------------------------------------------------------------------------------------------------------------------------------------------------------------------------------------------------|----------|----------------|
| <b>Q36 LES: Major change in social activities, e.g., parties, movies, visiting (increased or decreased participation)</b>                                                                                        | 600      | 414 (69.00%)   |
| Missing                                                                                                                                                                                                          |          | 4              |
| <b>Q13 LES: Changed work situation (different work responsibility, major change in working conditions, working hours, etc.)</b>                                                                                  | 597      | 330 (55.28%)   |
| Missing                                                                                                                                                                                                          |          | 7              |
| <b>Q29 LES: Major change in usual type and/or amount of recreation</b>                                                                                                                                           | 597      | 307 (51.42%)   |
| Missing                                                                                                                                                                                                          |          | 7              |
| <b>Q48 LES: Major change in childcare arrangement or schooling</b>                                                                                                                                               | 596      | 233 (39.09%)   |
| Missing                                                                                                                                                                                                          |          | 8              |
| <b>Q19 LES: Major change in financial status (a lot better off or a lot worse off)</b>                                                                                                                           | 599      | 171 (28.55%)   |
| Missing                                                                                                                                                                                                          |          | 5              |
| <b>Q6g. Major change in eating habits (much more or much less food intake)</b>                                                                                                                                   | 595      | 168 (28.24%)   |
| Missing                                                                                                                                                                                                          |          | 9              |
| <b>Q4 LES: Major change in sleeping habits (much more or much less sleep)</b>                                                                                                                                    | 600      | 153 (25.50%)   |
| Missing                                                                                                                                                                                                          |          | 4              |
| <b>Q26 LES: Major change in number of arguments with spouse (a lot more or a lot less arguments)</b>                                                                                                             | 589      | 132 (22.41%)   |
| Missing                                                                                                                                                                                                          |          | 15             |
| <b>Q24 LES: Major change in religious activities (increased or decreased attendance)</b>                                                                                                                         | 598      | 128 (21.40%)   |
| Missing                                                                                                                                                                                                          |          | 6              |
| <b>Q20 LES: Major change in closeness of family members (increased or decreased closeness)</b>                                                                                                                   | 599      | 124 (20.70%)   |
| Missing                                                                                                                                                                                                          |          | 5              |
| <i>Questions are adapted versions of the Life Experiences Survey (Sarason, et al. 1978) with an additional column asking whether they think the event was related to COVID-19 or subsequent control measures</i> |          |                |

**eTable 3. Risk Factors to Ceasing Outdoor Play or Exercise**

| Characteristic                                                               | N   | Overall, N = 585 | Ceasing outdoor play, N = 178 | aOR (95%CI) <sup>1</sup> | p-value (Wald test) |
|------------------------------------------------------------------------------|-----|------------------|-------------------------------|--------------------------|---------------------|
| <b>Monthly household income category, before Feb 2020</b>                    | 514 |                  |                               |                          | 0.03                |
| Median (IQR)                                                                 |     | 7.00 (4.00, 11)  | 6.00 (4.00, 9)                | 1.09 (1.01, 1.19)        |                     |
| Missing                                                                      |     | 71               | 22                            | 22                       |                     |
| <b>Monthly household income category, Mar - Jun 2020</b>                     | 516 |                  |                               |                          | 0.15                |
| Median (IQR)                                                                 |     | 6.00 (3.00, 10)  | 5.00 (3.00, 8)                | 1.06 (0.98, 1.14)        |                     |
| Missing                                                                      |     | 69               | 20                            | 20                       |                     |
| <b>Decrease in income</b>                                                    | 509 |                  |                               |                          | 0.69                |
| Yes                                                                          |     | 123 (24.17%)     | 38 (30.89%)                   | 0.91 (0.58, 1.44)        |                     |
| No                                                                           |     | 386 (75.83%)     | 117 (30.31%)                  | 1                        |                     |
| Missing                                                                      |     | 76               | 23                            | 23                       |                     |
| <b>Received financial support through government COVID-19 relief schemes</b> | 585 |                  |                               |                          | 0.71                |
| Yes                                                                          |     | 97 (16.58%)      | 30 (16.85%)                   | 0.91 (0.55, 1.50)        |                     |
| No                                                                           |     | 488 (83.42%)     | 148 (83.15%)                  | 1                        |                     |
| <b>Major change in social activities, e.g., parties, movies, visiting</b>    | 585 |                  |                               |                          | 0.01                |
| Yes                                                                          |     | 409 (69.91%)     | 133 (32.52%)                  | 1.71 (1.11, 2.61)        |                     |
| No                                                                           |     | 176 (30.09%)     | 45 (25.57%)                   | 1                        |                     |
| <b>Changed work situation</b>                                                | 581 |                  |                               |                          | 0.56                |
| Yes                                                                          |     | 326 (56.11%)     | 100 (30.67%)                  | 1.12 (0.76, 1.65)        |                     |
| No                                                                           |     | 255 (43.89%)     | 77 (30.20%)                   | 1                        |                     |
| Missing                                                                      |     | 4                | 1                             |                          |                     |
| <b>Major change in usual type and/or amount of recreation</b>                | 583 |                  |                               |                          | 0.04                |
| Yes                                                                          |     | 303 (51.97%)     | 100 (33.00%)                  | 1.49 (1.01, 2.19)        |                     |
| No                                                                           |     | 280 (48.03%)     | 77 (27.50%)                   | 1                        |                     |
| Missing                                                                      |     | 2                | 1                             |                          |                     |
| <b>Major change in childcare arrangement or schooling</b>                    | 582 |                  |                               |                          | 0.06                |
| Yes                                                                          |     | 232 (39.86%)     | 74 (31.90%)                   | 1.45 (0.99, 2.15)        |                     |
| No                                                                           |     | 350 (60.14%)     | 103 (29.43%)                  | 1                        |                     |
| Missing                                                                      |     | 3                | 1                             |                          |                     |
| <b>Major change in financial status</b>                                      | 583 |                  |                               |                          | 0.34                |
| Yes                                                                          |     | 169 (28.99%)     | 60 (35.50%)                   | 1.22 (0.82, 1.81)        |                     |

|                                                                                                                                                                                                                                     |     |              |              |                   |       |
|-------------------------------------------------------------------------------------------------------------------------------------------------------------------------------------------------------------------------------------|-----|--------------|--------------|-------------------|-------|
| No                                                                                                                                                                                                                                  |     | 414 (71.01%) | 118 (28.50%) | 1                 |       |
| Missing                                                                                                                                                                                                                             |     | 2            | 0            |                   | 0.008 |
| <b>Major change in eating habits</b>                                                                                                                                                                                                | 579 |              |              |                   |       |
| Yes                                                                                                                                                                                                                                 |     | 165 (28.50%) | 63 (38.18%)  | 1.74 (1.16, 2.61) |       |
| No                                                                                                                                                                                                                                  |     | 414 (71.50%) | 115 (27.78%) | 1                 |       |
| Missing                                                                                                                                                                                                                             |     | 6            | 0            |                   | 0.48  |
| <b>Major change in sleeping habits</b>                                                                                                                                                                                              | 583 |              |              |                   |       |
| Yes                                                                                                                                                                                                                                 |     | 150 (25.73%) | 45 (30.00%)  | 1.17 (0.76, 1.80) |       |
| No                                                                                                                                                                                                                                  |     | 433 (74.27%) | 133 (30.72%) | 1                 |       |
| Missing                                                                                                                                                                                                                             |     | 2            | 0            |                   |       |
| <b>Major change in number of arguments with spouse</b>                                                                                                                                                                              | 574 |              |              |                   | 0.11  |
| Yes                                                                                                                                                                                                                                 |     | 132 (23.00%) | 46 (34.85%)  | 1.42 (0.92, 2.19) |       |
| No                                                                                                                                                                                                                                  |     | 442 (77.00%) | 131 (29.64%) | 1                 |       |
| Missing                                                                                                                                                                                                                             |     | 11           | 1            |                   | 0.54  |
| <b>Major change in religious activities</b>                                                                                                                                                                                         | 583 |              |              |                   |       |
| Yes                                                                                                                                                                                                                                 |     | 127 (21.78%) | 40 (31.50%)  | 1.15 (0.74, 1.79) |       |
| No                                                                                                                                                                                                                                  |     | 456 (78.22%) | 137 (30.04%) | 1                 |       |
| Missing                                                                                                                                                                                                                             |     | 2            | 1            |                   |       |
| <b>Major change in closeness of family members</b>                                                                                                                                                                                  | 584 |              |              |                   | 0.29  |
| Yes                                                                                                                                                                                                                                 |     | 122 (20.89%) | 41 (33.61%)  | 1.27 (0.82, 1.96) |       |
| No                                                                                                                                                                                                                                  |     | 462 (79.11%) | 137 (29.65%) | 1                 |       |
| Missing                                                                                                                                                                                                                             |     | 1            | 0            |                   |       |
| <sup>1</sup> All models adjusted for cohort membership, maternal self-reported ethnicity, and maternal education<br>Income, income changes, government financial aid, and the top ten most frequently reported events were assessed |     |              |              |                   |       |

**eTable 4.** Adiposity Measures Prelockdown and Postlockdown Among Children in the Study

| <b>Adiposity measures</b>           | <b>N</b> | <b>Pre-lockdown</b> | <b>Post-lockdown</b> | <b>Difference</b>   | <b>p-value</b> |
|-------------------------------------|----------|---------------------|----------------------|---------------------|----------------|
| <b>BMI</b>                          |          |                     |                      |                     |                |
| All                                 | 508      | 16.81 (2.85)        | 17.62 (3.52)         | 0.81 (0.67, 1.00)   | <0.001         |
| GUSTO                               | 319      | 17.25 (3.36)        | 18.75 (3.89)         | 1.5 (1.3-1.7)       | <0.001         |
| S-PRESTO                            | 189      | 16.05 (1.38)        | 15.71 (1.39)         | 0.34 (0.18-0.51)    | <0.001         |
| <b>BMI z-score</b>                  |          |                     |                      |                     |                |
| All                                 | 508      | 0.20 (1.34)         | 0.39 (1.37)          | 0.19 (0.13-0.25)    | <0.001         |
| GUSTO                               | 319      | 0.30 (1.50)         | 0.57 (1.50)          | 0.27 (0.21-0.34)    | <0.001         |
| S-PRESTO                            | 189      | 0.03 (1.00)         | 0.07 (1.03)          | 0.04 (-0.08-0.16)   | 0.5            |
| <b>Abdominal circumference (cm)</b> |          |                     |                      |                     |                |
| All                                 | 403      | 58.67 (12.24)       | 63.01(13.27)         | 4.3 (3.8, 4.9)      | <0.001         |
| GUSTO                               | 317      | 62.59 (10.77)       | 67.59 (11.07)        | 5 (4.4, 5.6)        | <0.001         |
| S-PRESTO                            | 86       | 44.25 (3.15)        | 46.14 (3.36)         | 1.9 (1.4, 2.4)      | <0.001         |
| <b>Biceps skinfold (mm)</b>         |          |                     |                      |                     |                |
| All                                 | 349      | 7.98 (3.59)         | 9.02 (4.05)          | 1.0 (0.77, 1.3)     | <0.001         |
| GUSTO                               | 318      | 8.14 (3.69)         | 9.28 (4.09)          | 1.1 (0.85, 1.4)     | <0.001         |
| S-PRESTO                            | 31       | 6.29 (1.58)         | 6.39 (2.36)          | 0.10 (0.79, 1.0)    | 0.8            |
| <b>Suprailiac skinfold (mm)</b>     |          |                     |                      |                     |                |
| All                                 | 347      | 10.32 (6.96)        | 12.40 (7.41)         | 2.1 (1.7, 2.5)      | <0.001         |
| GUSTO                               | 317      | 10.81 (7.01)        | 13.04 (7.38)         | 2.2 (1.8-2.7)       | <0.001         |
| S-PRESTO                            | 30       | 5.23 (3.74)         | 5.56 (2.96)          | 0.33 (0.43, 1.1)    | 0.4            |
| <b>Triceps skinfold (mm)</b>        |          |                     |                      |                     |                |
| All                                 | 502      | 12.09 (5.03)        | 13.46 (5.56)         | 1.4 (1.1, 1.6)      | <0.001         |
| GUSTO                               | 318      | 13.56 (5.62)        | 15.42 (6.01)         | 1.9 (1.5, 2.2)      | <0.001         |
| S-PRESTO                            | 184      | 9.55 (2.11)         | 10.07 (1.95)         | 0.51 (0.24, 0.79)   | <0.001         |
| <b>Triceps z-score</b>              |          |                     |                      |                     |                |
| S-PRESTO                            | 184      | 0.79 (0.97)         | 0.97 (0.79)          | 0.17 (0.05, 0.30)   | 0.006          |
| <b>Subscapular skinfold (mm)</b>    |          |                     |                      |                     |                |
| All                                 | 502      | 9.48 (5.68)         | 10.28 (6.06)         | 0.79 (0.51, 1.1)    | <0.001         |
| GUSTO                               | 318      | 10.98 (6.59)        | 12.34 (6.62)         | 1.4 (1.0, 1.8)      | <0.001         |
| S-PRESTO                            | 184      | 6.90 (1.55)         | 6.71 (2.06)          | -0.19 (-0.43, 0.05) | 0.12           |
| <b>Subscapular z-score</b>          |          |                     |                      |                     |                |
| S-PRESTO                            | 184      | 0.43 (0.99)         | 0.41(1.09)           | -0.02 (-0.16, 0.12) | 0.8            |

*Mean differences (95% confidence intervals) and p-values from paired t-tests were reported. Triceps and subscapular z-scores were only computed for children under 5 years, per WHO growth curve standards.*

**eFigure 1.** Parent-Reported Changes in Child’s Social Activities By Cohort

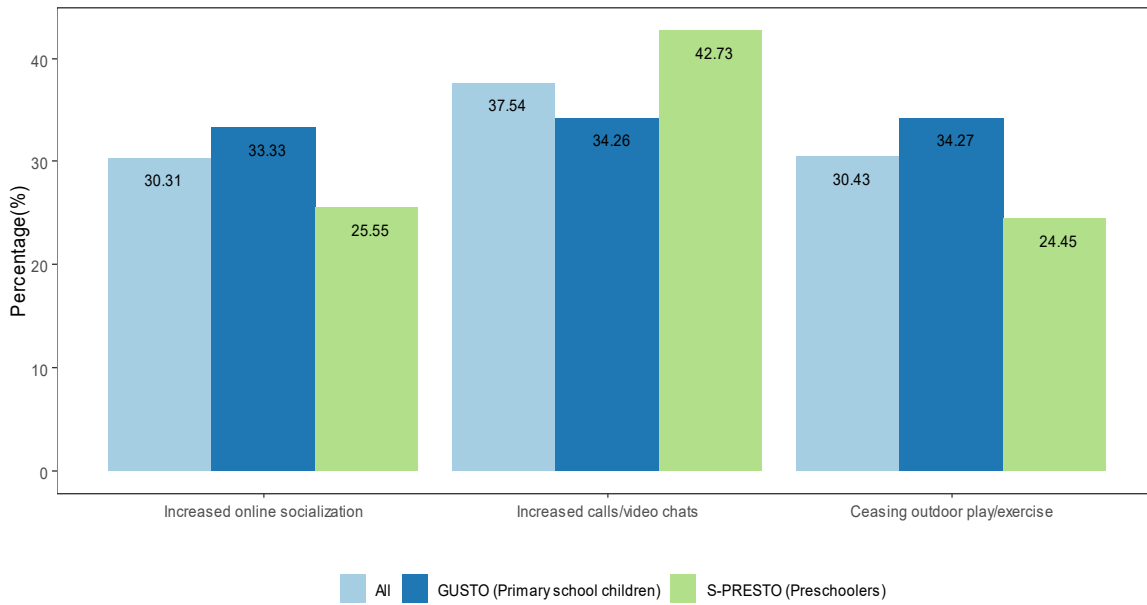

**eFigure 2.** Frequency of COVID-19–Related Education or Discussion

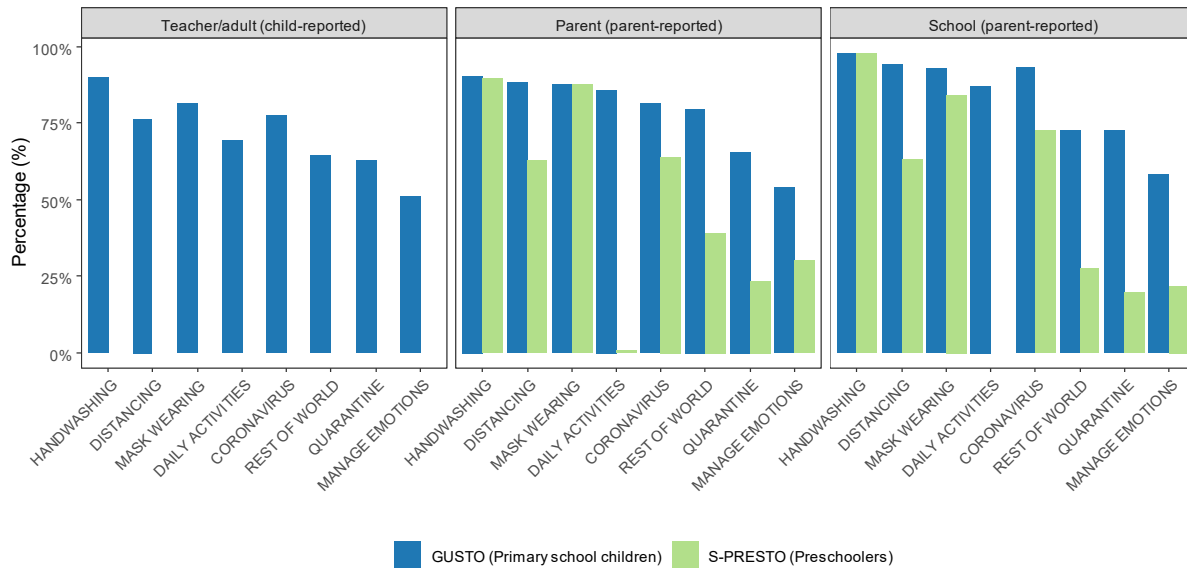

Parents were asked if children learned about a selection of COVID-19 related topics from themselves (“parent”) or at school (“school”). School-aged children were asked whether they discussed any of these topics with a teacher or other adult include a parent (“teacher/adult”). The reporter, either parent or child, is given in parentheses.

**eFigure 3.** Family Dynamics Postlockdown Compared to Prelockdown Period as Reported by School-Aged Child or Parent

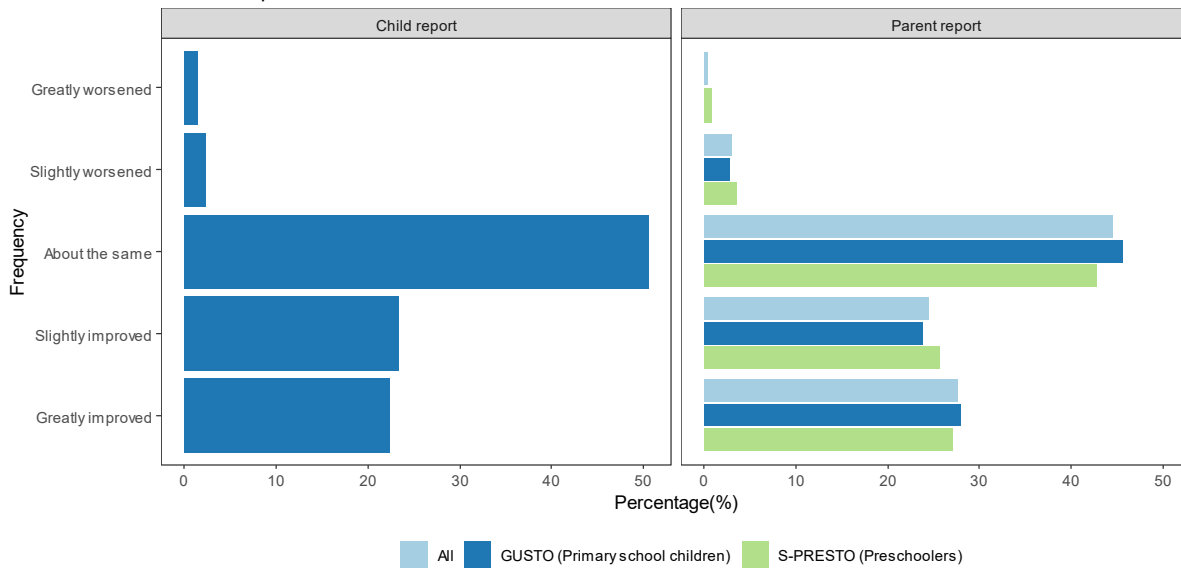

**eFigure 4.** Parent- and Child-Reported Child Sleep Duration in the Postlockdown Period in School-Aged Children (GUSTO) Only

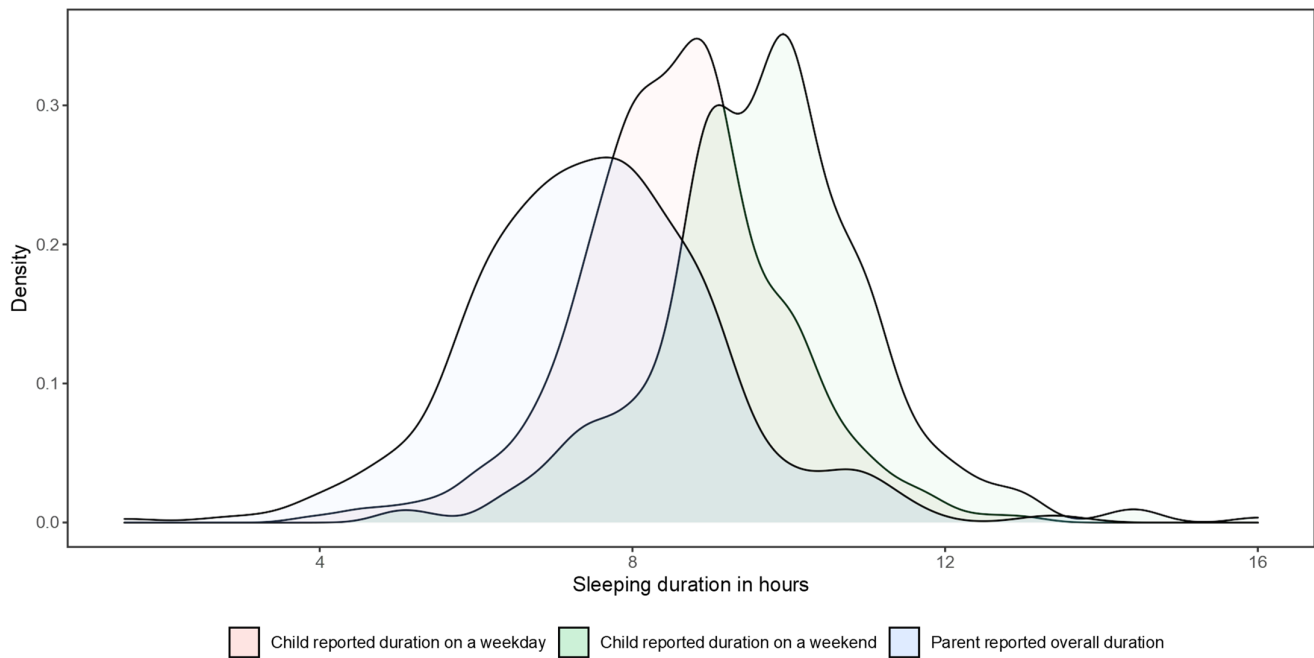



**eFigure 5.** Parent-Reported Child Desire or Aversion to Activities Outside the Home During Lockdown

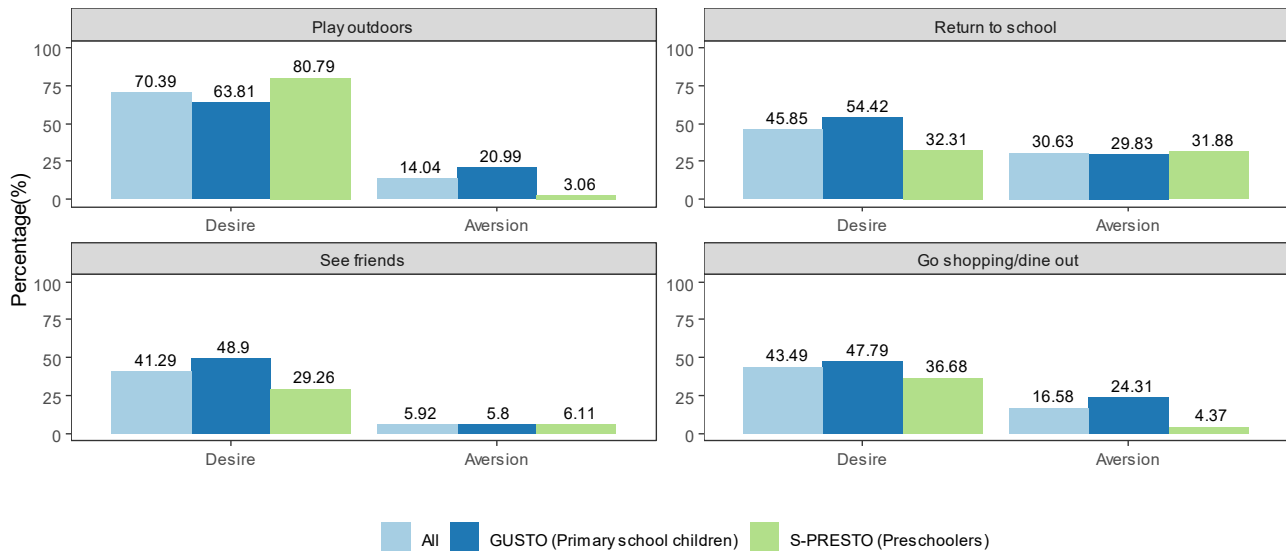

\* All preferences differed by cohort ( $p < 0.05$  using Fisher's exact test) except aversion to see friends and return to school.

\* Only those who answered 'yes' are displayed.

**eFigure 6.** Average Ratings of the Parent-Reported Life Experiences in the Order of Most Negative to Most Positive

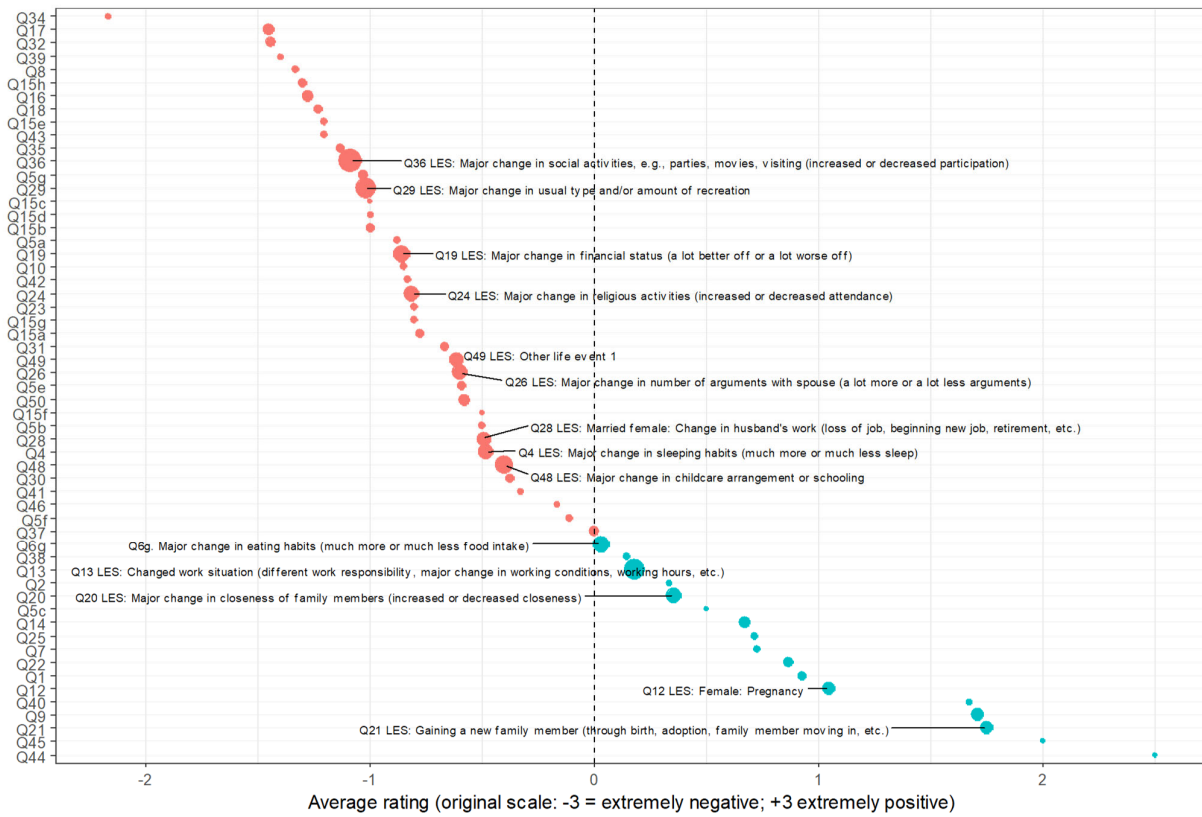

Dot sizes are proportional to number of events reported. Labelled events are those reported more than 75 times (~12.5% of participants).

**eFigure 7.** Non-Neutral (Positive or Negative Ratings) of Major Recent Life Experiences, in Descending Order of Negative Ratings

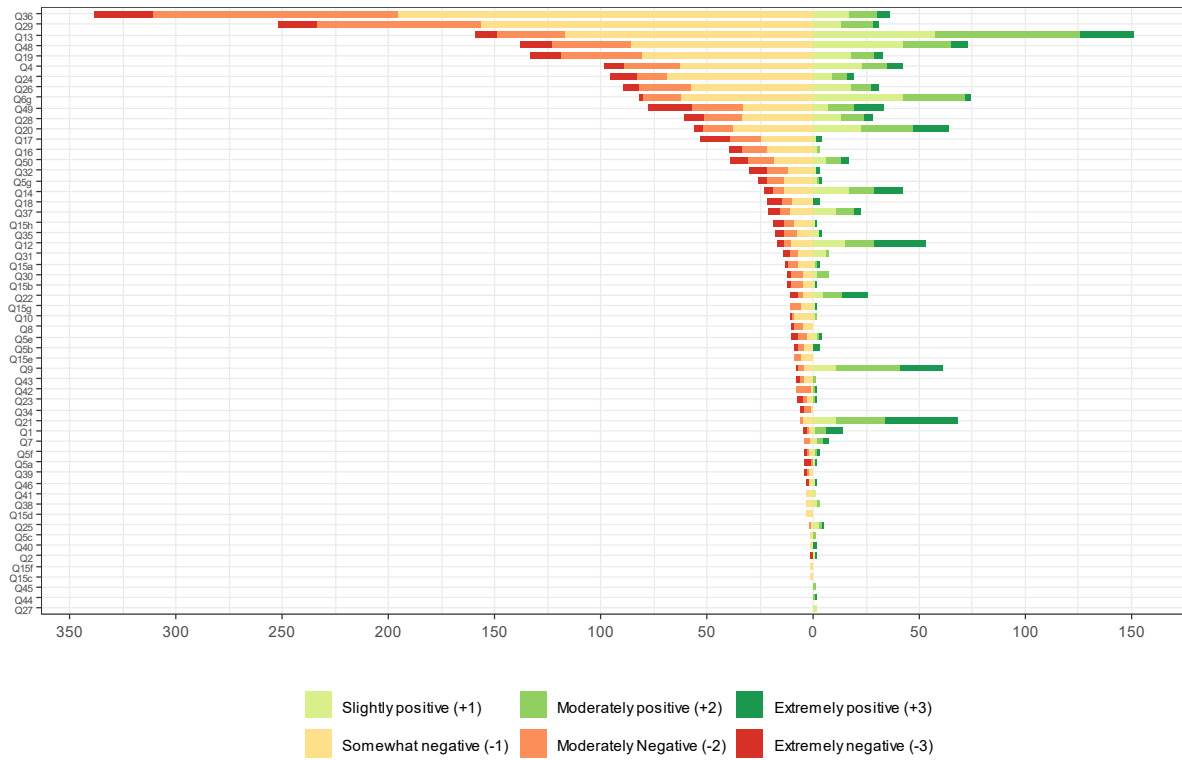

X-axis shows the number of respondents reporting the event. Many events have highly divergent ratings including Q13 (“Changed work situation”), Q6g (“Major change in eating habits”), and Q20 (“Major change in closeness of family members”). Full questions can be found in the Life Experiences Survey.

**eFigure 8.** Association Between Prelockdown Household Income (per SGD 1000 Higher Income) and Odds of Having a Major Life Experience (yes/no), Adjusted for Cohort Membership

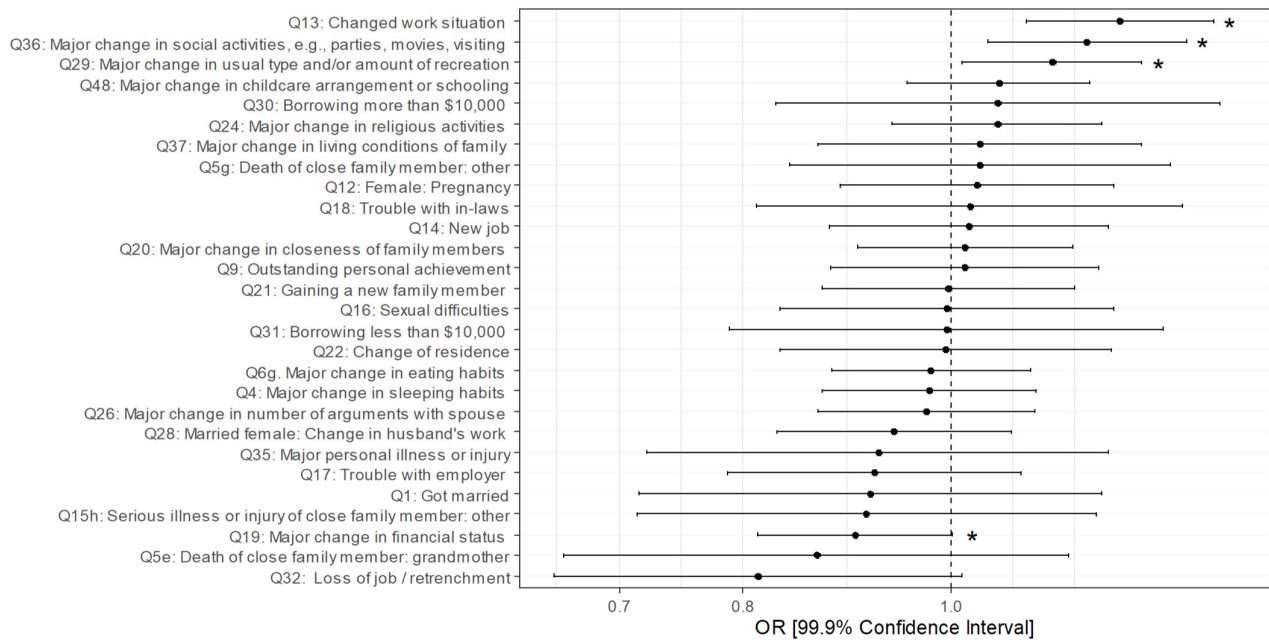

**eFigure 9.** Association Between Prelockdown Household Income (per SGD 2000 Higher Income) and Rating of Major Life Experience Among Those Who Experienced That Event, Adjusted for Cohort Membership

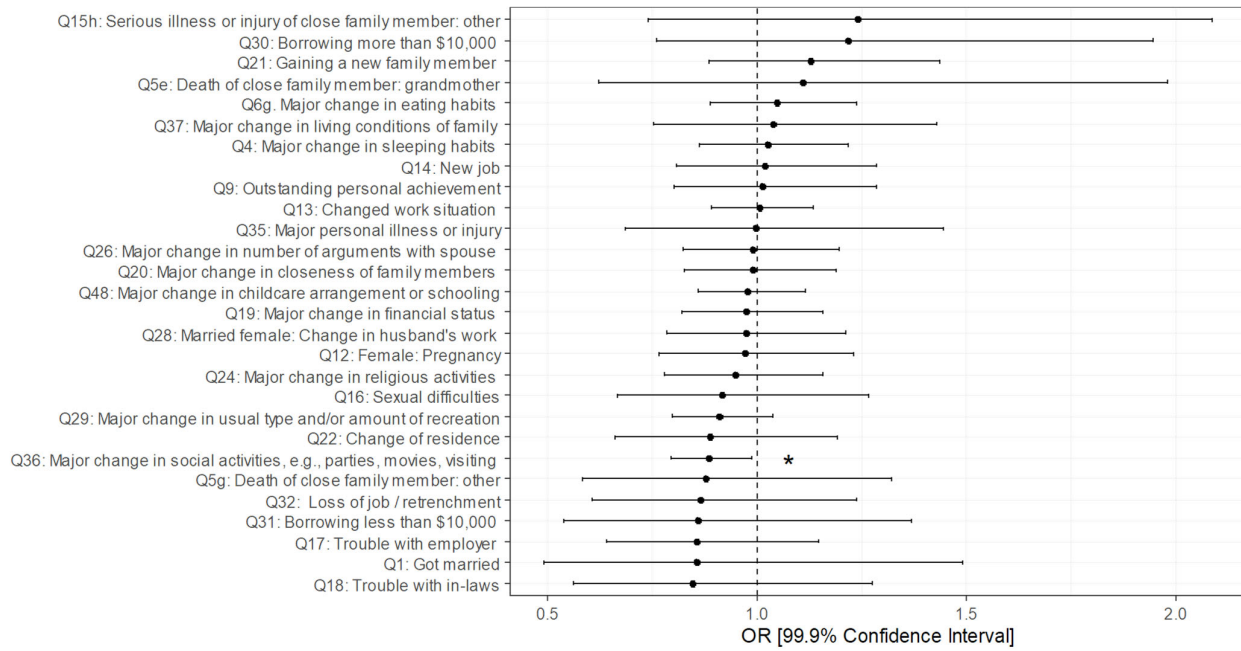

## The Life Experiences Survey

**Date of Interview:**   /    /      
d d m m m y y y y

**Person completing questionnaire:**

Mother  Father  Caregiver, relationship to GUSTO child: \_\_\_\_\_

Listed below are a number of events which sometimes bring about change in the lives of those who experience them and which necessitate social readjustment.

- If you *did not* experience an event within the last year (before the date of this survey), please mark under the 'N.A.' column.
- If you experienced an event, please mark whether the event occurred “0 to 6 months ago,” “7 months to 1 year ago,” or both.
- Mark “COVID-19 related?” if you believe this event was at all a result of COVID-19, include due to public safety measures such as social distancing or the “circuit breaker” or the global economic downturn.

Also, for each item checked below, please indicate the extent to which you viewed the event as having either a positive or negative impact on your life at the time the event occurred. That is, indicate the type and extent of impact that the event had:

- A rating of -3 would indicate an extremely negative impact.
- A rating of 0 suggests no impact either positive or negative.
- A rating of +3 would indicate an extremely positive impact.

Be sure that all marks are directly across from the event they correspond to.

|                                                                       | N.A. | 0 to 6 months ago | 7 months to 1 year ago | COVID-19 related? | Extremely negative | Moderately negative | Somewhat negative | No impact | Slightly positive | Moderately positive | Extremely positive |
|-----------------------------------------------------------------------|------|-------------------|------------------------|-------------------|--------------------|---------------------|-------------------|-----------|-------------------|---------------------|--------------------|
| 1. Got married                                                        |      |                   |                        |                   | -3                 | -2                  | -1                | 0         | +1                | +2                  | +3                 |
| 2. Detention in jail                                                  |      |                   |                        |                   | -3                 | -2                  | -1                | 0         | +1                | +2                  | +3                 |
| 3. Death of spouse                                                    |      |                   |                        |                   | -3                 | -2                  | -1                | 0         | +1                | +2                  | +3                 |
| 4. Major change in sleeping habits (much more or much less sleep)     |      |                   |                        |                   | -3                 | -2                  | -1                | 0         | +1                | +2                  | +3                 |
| 5. Death of close family member:                                      |      |                   |                        |                   | -3                 | -2                  | -1                | 0         | +1                | +2                  | +3                 |
| a. mother                                                             |      |                   |                        |                   | -3                 | -2                  | -1                | 0         | +1                | +2                  | +3                 |
| b. father                                                             |      |                   |                        |                   | -3                 | -2                  | -1                | 0         | +1                | +2                  | +3                 |
| c. brother                                                            |      |                   |                        |                   | -3                 | -2                  | -1                | 0         | +1                | +2                  | +3                 |
| d. sister                                                             |      |                   |                        |                   | -3                 | -2                  | -1                | 0         | +1                | +2                  | +3                 |
| e. grandmother                                                        |      |                   |                        |                   | -3                 | -2                  | -1                | 0         | +1                | +2                  | +3                 |
| f. grandfather                                                        |      |                   |                        |                   | -3                 | -2                  | -1                | 0         | +1                | +2                  | +3                 |
| g. other (specify: _____)                                             |      |                   |                        |                   | -3                 | -2                  | -1                | 0         | +1                | +2                  | +3                 |
| 6. Major change in eating habits (much more or much less food intake) |      |                   |                        |                   | -3                 | -2                  | -1                | 0         | +1                | +2                  | +3                 |
| 7. Foreclosure on mortgage or loan                                    |      |                   |                        |                   | -3                 | -2                  | -1                | 0         | +1                | +2                  | +3                 |
| 8. Death of close friend                                              |      |                   |                        |                   | -3                 | -2                  | -1                | 0         | +1                | +2                  | +3                 |

| 9. Outstanding personal achievement                                                                                 |      |                   |                        |                   | -3                 | -2                  | -1                | 0         | +1                | +2                  | +3                 |
|---------------------------------------------------------------------------------------------------------------------|------|-------------------|------------------------|-------------------|--------------------|---------------------|-------------------|-----------|-------------------|---------------------|--------------------|
|                                                                                                                     | N.A. | 0 to 6 months ago | 7 months to 1 year ago | COVID-19 related? | Extremely negative | Moderately negative | Somewhat negative | No impact | Slightly positive | Moderately positive | Extremely positive |
| 10. Minor law violations (traffic tickets, disturbing the peace, etc.)                                              |      |                   |                        |                   | -3                 | -2                  | -1                | 0         | +1                | +2                  | +3                 |
| 11. <i>Male</i> : Wife/girlfriend's pregnancy                                                                       |      |                   |                        |                   | -3                 | -2                  | -1                | 0         | +1                | +2                  | +3                 |
| 12. <i>Female</i> : Pregnancy                                                                                       |      |                   |                        |                   | -3                 | -2                  | -1                | 0         | +1                | +2                  | +3                 |
| 13. Changed work situation (different work responsibility, major change in working conditions, working hours, etc.) |      |                   |                        |                   | -3                 | -2                  | -1                | 0         | +1                | +2                  | +3                 |
| 14. New job                                                                                                         |      |                   |                        |                   | -3                 | -2                  | -1                | 0         | +1                | +2                  | +3                 |
| 15. Serious illness or injury of close family member:                                                               |      |                   |                        |                   | -3                 | -2                  | -1                | 0         | +1                | +2                  | +3                 |
| a. mother                                                                                                           |      |                   |                        |                   | -3                 | -2                  | -1                | 0         | +1                | +2                  | +3                 |
| b. father                                                                                                           |      |                   |                        |                   | -3                 | -2                  | -1                | 0         | +1                | +2                  | +3                 |
| c. brother                                                                                                          |      |                   |                        |                   | -3                 | -2                  | -1                | 0         | +1                | +2                  | +3                 |
| d. sister                                                                                                           |      |                   |                        |                   | -3                 | -2                  | -1                | 0         | +1                | +2                  | +3                 |
| e. grandmother                                                                                                      |      |                   |                        |                   | -3                 | -2                  | -1                | 0         | +1                | +2                  | +3                 |
| f. grandfather                                                                                                      |      |                   |                        |                   | -3                 | -2                  | -1                | 0         | +1                | +2                  | +3                 |
| g. spouse                                                                                                           |      |                   |                        |                   | -3                 | -2                  | -1                | 0         | +1                | +2                  | +3                 |
| h. other (specify: _____)                                                                                           |      |                   |                        |                   | -3                 | -2                  | -1                | 0         | +1                | +2                  | +3                 |
| 16. Sexual difficulties                                                                                             |      |                   |                        |                   | -3                 | -2                  | -1                | 0         | +1                | +2                  | +3                 |
| 17. Trouble with employer (in danger of losing job, being suspended, demoted, etc.)                                 |      |                   |                        |                   | -3                 | -2                  | -1                | 0         | +1                | +2                  | +3                 |
| 18. Trouble with in-laws                                                                                            |      |                   |                        |                   | -3                 | -2                  | -1                | 0         | +1                | +2                  | +3                 |
| 19. Major change in financial status (a lot better off or a lot worse off)                                          |      |                   |                        |                   | -3                 | -2                  | -1                | 0         | +1                | +2                  | +3                 |
| 20. Major change in closeness of family members (increased or decreased closeness)                                  |      |                   |                        |                   | -3                 | -2                  | -1                | 0         | +1                | +2                  | +3                 |
| 21. Gaining a new family member (through birth, adoption, family member moving in, etc.)                            |      |                   |                        |                   | -3                 | -2                  | -1                | 0         | +1                | +2                  | +3                 |
| 22. Change of residence                                                                                             |      |                   |                        |                   | -3                 | -2                  | -1                | 0         | +1                | +2                  | +3                 |
| 23. Marital separation (due to conflict)                                                                            |      |                   |                        |                   | -3                 | -2                  | -1                | 0         | +1                | +2                  | +3                 |
| 24. Major change in religious activities (increased or decreased attendance)                                        |      |                   |                        |                   | -3                 | -2                  | -1                | 0         | +1                | +2                  | +3                 |

|                            |  |  |  |  |    |    |    |   |    |    |    |
|----------------------------|--|--|--|--|----|----|----|---|----|----|----|
| 25. Marital reconciliation |  |  |  |  | -3 | -2 | -1 | 0 | +1 | +2 | +3 |
|----------------------------|--|--|--|--|----|----|----|---|----|----|----|



|                                                                                                                              | N.A. | 0 to 6 months ago | 7 months to 1 year ago | COVID-19 related? | Extremely negative | Moderately negative | Somewhat negative | No impact | Slightly positive | Moderately positive | Extremely positive |
|------------------------------------------------------------------------------------------------------------------------------|------|-------------------|------------------------|-------------------|--------------------|---------------------|-------------------|-----------|-------------------|---------------------|--------------------|
| 26. Major change in number of arguments with spouse (a lot more or a lot less arguments)                                     |      |                   |                        |                   | -3                 | -2                  | -1                | 0         | +1                | +2                  | +3                 |
| 27. <i>Married male</i> : Change in wife's work outside the home (beginning work, ceasing work, changing to a new job, etc.) |      |                   |                        |                   | -3                 | -2                  | -1                | 0         | +1                | +2                  | +3                 |
| 28. <i>Married female</i> : Change in husband's work (loss of job, beginning new job, retirement, etc.)                      |      |                   |                        |                   | -3                 | -2                  | -1                | 0         | +1                | +2                  | +3                 |
| 29. Major change in usual type and/or amount of recreation                                                                   |      |                   |                        |                   | -3                 | -2                  | -1                | 0         | +1                | +2                  | +3                 |
| 30. Borrowing more than \$10,000 (buying home, business, etc.)                                                               |      |                   |                        |                   | -3                 | -2                  | -1                | 0         | +1                | +2                  | +3                 |
| 31. Borrowing less than \$10,000 (buying car, TV, getting school loan, etc.)                                                 |      |                   |                        |                   | -3                 | -2                  | -1                | 0         | +1                | +2                  | +3                 |
| 32. Loss of job / retrenchment                                                                                               |      |                   |                        |                   | -3                 | -2                  | -1                | 0         | +1                | +2                  | +3                 |
| 33. <i>Male</i> : Wife/girlfriend having abortion                                                                            |      |                   |                        |                   | -3                 | -2                  | -1                | 0         | +1                | +2                  | +3                 |
| 34. <i>Female</i> : Having abortion                                                                                          |      |                   |                        |                   | -3                 | -2                  | -1                | 0         | +1                | +2                  | +3                 |
| 35. Major personal illness or injury                                                                                         |      |                   |                        |                   | -3                 | -2                  | -1                | 0         | +1                | +2                  | +3                 |
| 36. Major change in social activities, e.g., parties, movies, visiting (increased or decreased participation)                |      |                   |                        |                   | -3                 | -2                  | -1                | 0         | +1                | +2                  | +3                 |
| 37. Major change in living conditions of family (building new home, remodeling, deterioration of home, neighborhood, etc.)   |      |                   |                        |                   | -3                 | -2                  | -1                | 0         | +1                | +2                  | +3                 |
| 38. Divorce                                                                                                                  |      |                   |                        |                   | -3                 | -2                  | -1                | 0         | +1                | +2                  | +3                 |
| 39. Serious injury or illness of close friend                                                                                |      |                   |                        |                   | -3                 | -2                  | -1                | 0         | +1                | +2                  | +3                 |
| 40. Retirement from work                                                                                                     |      |                   |                        |                   | -3                 | -2                  | -1                | 0         | +1                | +2                  | +3                 |
| 41. Son or daughter leaving home (due to marriage, college, etc.)                                                            |      |                   |                        |                   | -3                 | -2                  | -1                | 0         | +1                | +2                  | +3                 |
| 42. Ending of formal schooling                                                                                               |      |                   |                        |                   | -3                 | -2                  | -1                | 0         | +1                | +2                  | +3                 |

|                                                                                       | N.A. | 0 to 6 months ago | 7 months to 1 year ago | COVID-19 related? | Extremely negative | Moderately negative | Somewhat negative | No impact | Slightly positive | Moderately positive | Extremely positive |
|---------------------------------------------------------------------------------------|------|-------------------|------------------------|-------------------|--------------------|---------------------|-------------------|-----------|-------------------|---------------------|--------------------|
| 43. Separation from spouse (due to work, travel, etc.)                                |      |                   |                        |                   | -3                 | -2                  | -1                | 0         | +1                | +2                  | +3                 |
| 44. Engagement                                                                        |      |                   |                        |                   | -3                 | -2                  | -1                | 0         | +1                | +2                  | +3                 |
| 45. Breaking up with boyfriend/girlfriend                                             |      |                   |                        |                   | -3                 | -2                  | -1                | 0         | +1                | +2                  | +3                 |
| 46. Leaving home for the first time                                                   |      |                   |                        |                   | -3                 | -2                  | -1                | 0         | +1                | +2                  | +3                 |
| 47. Reconciliation with boyfriend/girlfriend                                          |      |                   |                        |                   | -3                 | -2                  | -1                | 0         | +1                | +2                  | +3                 |
| 48. Major change in childcare arrangement or schooling                                |      |                   |                        |                   | -3                 | -2                  | -1                | 0         | +1                | +2                  | +3                 |
| <b>Other recent experiences which have had an impact on your life. List and rate.</b> |      |                   |                        |                   |                    |                     |                   |           |                   |                     |                    |
| 49.<br>_____                                                                          |      |                   |                        |                   | -3                 | -2                  | -1                | 0         | +1                | +2                  | +3                 |
| 50.<br>_____                                                                          |      |                   |                        |                   | -3                 | -2                  | -1                | 0         | +1                | +2                  | +3                 |
